# Supplementary material
Source: PubMed Central journal article supplement (PMC3286810)
Supplement: Supp_Data.pdf [file Supp_Data.pdf]

## Supplementary Data

SUPPLEMENTARY TABLE S1. INDEPENDENT VALIDATION OF MOLECULAR MARKERS BY IMMUNOHISTOCHEMISTRY AND REAL-TIME RT-PCR ANALYSES

| Gene name                                                          | Gene symbol <sup>a</sup> | Tumor                        |                          | FNA                         |
|--------------------------------------------------------------------|--------------------------|------------------------------|--------------------------|-----------------------------|
|                                                                    |                          | QRT-PCR <sup>b</sup> (n=107) | IHC <sup>c</sup> (n=154) | QRT-PCR <sup>c</sup> (n=95) |
| Overexpressed in malignant tumors                                  |                          |                              |                          |                             |
| High mobility group AT-hook 2                                      | <i>HMGA2</i>             | ✓                            | ✓                        | ✓                           |
| Kallikrein 7 (chymotryptic, stratum corneum), transcript variant 1 | <i>KLK7</i>              | –                            | ✓                        | –                           |
| Mannose receptor C2                                                | <i>MRC2/Endo 180</i>     | –                            | ✓                        | ✓                           |
| Leucine-rich repeat kinase 2                                       | <i>LRRK2</i>             | ✓                            | –                        | –                           |
| Pleomorphic adenoma gene 1                                         | <i>PLAG1</i>             | ✓                            | ✓                        | ✓                           |
| Cytochrome P450, family 1, subfamily B, polypeptide 1              | <i>CYP1B1</i>            | –                            | ✓                        | –                           |
| Dipeptidyl-peptidase 4                                             | <i>DPP4/CD26</i>         | ✓                            | ✓                        | ✓                           |
| Fibronectin type III                                               | <i>FNDC4</i>             | –                            | –                        | ✓                           |
| Cadherin 3 type1, type 1, P-cadherin (placental)                   | <i>CDH3/P-Cadherin</i>   | ✓                            | ✓                        | ✓                           |
| Carcinoembryonic antigen-related cell adhesion molecule 6          | <i>CEACAM6</i>           | ✓                            | –                        | ✓                           |
| Protease serine 3 (PRSS3/mesotrypsin)                              | <i>PRSS3</i>             | ✓                            | –                        | ✓                           |
| Phosphodiesterase 5 A, cGMP-specific, transcript variant 3         | <i>PDE5A</i>             | ✓                            | –                        | –                           |
| Sparc/osteonectin CWCV, and kazal-like domain proteoglycan         | <i>SPOCK1</i>            | ✓                            | –                        | ✓                           |
| DIRAS family, GTP-binding RAS-like 3                               | <i>DIRAS3/ARH1</i>       | –                            | ✓                        | –                           |
| Stratifin                                                          | <i>SFN/14-3-3σ</i>       | –                            | ✓                        | ✓                           |
| Underexpressed in malignant tumors                                 |                          |                              |                          |                             |
| Recombination activating gene 2                                    | <i>RAG2</i>              | ✓                            | –                        | –                           |
| Angiotensin II receptor, type 1, transcript variant 5              | <i>AGTR1</i>             | ✓                            | –                        | –                           |
| v-Kit Hardy-Zuckerman 4 feline sarcoma viral oncogene homologue    | <i>KIT</i>               | –                            | ✓                        | –                           |
| Thyroid peroxidase, transcript variant 5                           | <i>TPO5</i>              | ✓                            | –                        | –                           |

<sup>a</sup>Gene list based on rank order from our microarray analysis (19).

<sup>b</sup>Data previously published (19).

<sup>c</sup>Data shown in present study.

FNA, fine needle aspiration; IHC, immunohistochemistry; QRT-PCR, quantitative real-time RT-PCR.

SUPPLEMENTARY TABLE S2. PRIMER SEQUENCE, ANNEALING CONDITION, AND AMPLICON SIZE

| Gene           | Forward sequence                | Reverse sequence               | Annealing | Amplicon |
|----------------|---------------------------------|--------------------------------|-----------|----------|
| <i>HMGA2</i>   | 5'-GAGTCCCTCTAAAGCAGCTCA-3'     | 5'-CTAGTCCTCTTCGGCAGACTCT-3'   | 56        | 156 bp   |
| <i>MRC2</i>    | 5'-AAGTGGTCAGAGGCACAGTTCTCC-3'  | 5'-CCAGTTGGCATAACATCAAAGGC-3'  | 55        | 189 bp   |
| <i>PLAG1</i>   | 5'-ATGGAGTTACAAGGTGGCGTGC-3'    | 5'-CCAATGCTGGTGTGTTTAGGGG-3'   | 56        | 169 bp   |
| <i>DPP4</i>    | 5'-TGCGGTGTTCAAGTGTGGAATAG-3'   | 5'-CAAGGTTGTCTTCTGGAGTTGGG-3'  | 55        | 110 bp   |
| <i>FNDC4</i>   | 5'-TCACAGTGAAGGTCTGGATGG-3'     | 5'-GGGATTGTTGTTGGAGTCATTGTC-3' | 55        | 149 bp   |
| <i>CDH3</i>    | 5'-TGAGAACCTGAAGGCGGCTAAC-3'    | 5'-AATCTTGGTCTTGGTTCGGAGGC-3'  | 56        | 140 bp   |
| <i>CEACAM6</i> | 5'-GGGGAAAATCTGAACCTCTCCTG-3'   | 5'-CAGTGGCTGAGTTATGGGCTTG-3'   | 55        | 166 bp   |
| <i>PRSS3</i>   | 5'-ATCAAACCTCTCCTCACCTGCCGTC-3' | 5'-TCGTCTGGGTAGTCAGCACCAAAG-3' | 56        | 140 bp   |
| <i>SPOCK1</i>  | 5'-GCTATTACAAAGCCACACAGTGCC-3'  | 5'-AAATCCCCTGAGGTTTCCTGC-3'    | 55        | 136 bp   |
| <i>SFN</i>     | 5'-CCAGTATTGAGCAGAAAAGCAACG-3'  | 5'-TCGTAGTGAAGACGGAAAAGTTC-3'  | 55        | 358 bp   |
| <i>GAPDH</i>   | 5'-TGACAACCTTTGGTATCGTGGAAGG-3' | 5'-AGGCAGGGATGATGTTCTGGAG-3'   | 56        | 134 bp   |

SUPPLEMENTARY TABLE S3. CORRELATION MATRIX OF PROTEIN EXPRESSION AMONG GENE PAIRS

|                  | <i>HMGA2</i> | <i>PLAG1</i> | <i>KLK7</i> | <i>CDH3</i> | <i>Stratifin</i> | <i>CYP1B1</i> | <i>DIRAS3</i> | <i>DPP4</i> | <i>MRC2</i> | <i>c-KIT</i> |
|------------------|--------------|--------------|-------------|-------------|------------------|---------------|---------------|-------------|-------------|--------------|
| <i>HMGA2</i>     | 1            | 0.36         | 0.26        | 0.39        | 0.47             | 0.33          | 0.45          | 0.25        | 0.35        | 0.17         |
| <i>PLAG1</i>     | 0.36         | 1            | 0.52        | 0.59        | 0.35             | 0.34          | 0.47          | 0.41        | 0.56        | 0.43         |
| <i>KLK7</i>      | 0.26         | 0.52         | 1           | 0.53        | 0.42             | 0.43          | 0.49          | 0.49        | 0.52        | 0.5          |
| <i>CDH3</i>      | 0.39         | 0.59         | 0.53        | 1           | 0.23             | 0.36          | 0.64          | 0.43        | 0.56        | 0.5          |
| <i>Stratifin</i> | 0.47         | 0.35         | 0.42        | 0.23        | 1                | 0.32          | 0.55          | 0.4         | 0.48        | 0.18         |
| <i>CyP1B1</i>    | 0.33         | 0.34         | 0.43        | 0.36        | 0.32             | 1             | 0.38          | 0.37        | 0.25        | 0.32         |
| <i>DIRAS3</i>    | 0.45         | 0.47         | 0.49        | 0.64        | 0.55             | 0.38          | 1             | 0.45        | 0.58        | 0.47         |
| <i>DPP4</i>      | 0.25         | 0.41         | 0.49        | 0.43        | 0.4              | 0.37          | 0.45          | 1           | 0.64        | 0.65         |
| <i>MRC2</i>      | 0.35         | 0.56         | 0.52        | 0.56        | 0.48             | 0.25          | 0.58          | 0.64        | 1           | 0.66         |
| <i>c-KIT</i>     | 0.17         | 0.43         | 0.5         | 0.5         | 0.18             | 0.32          | 0.47          | 0.65        | 0.66        | 1            |

SUPPLEMENTARY TABLE S4. EVALUATION AND TESTING THE PERFORMANCE BETWEEN GENE-COMBINATION MODELS

| <i>Gene combination</i>            | <i>AUC</i> | <i>p-value compared with All 10 genes model</i> | <i>p-value compared with HMGA2+MRC2+Stratifin model [DeLong's method (21)]</i> |
|------------------------------------|------------|-------------------------------------------------|--------------------------------------------------------------------------------|
| <i>HMGA2+MRC2</i>                  | 0.9        | 0.007                                           | 0.06                                                                           |
| <i>HMGA2+Stratifin</i>             | 0.95       | 0.05                                            | 0.48                                                                           |
| <i>MRC2+Stratifin</i>              | 0.87       | 0.005                                           | 0.02                                                                           |
| <i>HMGA2+MRC2+Stratifin</i>        | 0.95       | 0.08                                            | –                                                                              |
| <i>HMGA2+MRC2+Stratifin+CyP1B1</i> | 0.97       | 0.14                                            | 0.15                                                                           |
| <i>All 10 genes</i>                | 0.99       | –                                               | 0.08                                                                           |

AUC, area under the curve.
